# Supplementary material for: Single-Cell Transcriptional Profiling of Mouse Islets Following Short-Term Obesogenic Dietary Intervention
Source: MDPI journal article supplement (doi:10.3390/metabo10120513), 2020-12-18
Supplement: s1 [file s1]

**Supplemental Table S1.** Percentage of cells per cluster identified by sc-RNAseq.

|                | LFD1 | LFD2 | LFD3 | HFD1 | HFD2 | HFD3 | HFD4 |
|----------------|------|------|------|------|------|------|------|
| $\beta$ cells  | 69   | 66   | 55   | 67   | 68   | 64   | 58   |
| $\alpha$ cells | 12   | 14   | 28   | 16   | 14   | 15   | 16   |
| $\delta$ cells | 4    | 7    | 6    | 6    | 6    | 6    | 5    |
| Acinar         | 0    | 1    | 2    | 0    | 1    | 4    | 8    |
| Other          | 14   | 11   | 7    | 9    | 10   | 10   | 11   |
| Unclassified   | 2    | 2    | 2    | 3    | 2    | 2    | 2    |
| Total          | 100  | 100  | 100  | 100  | 100  | 100  | 100  |

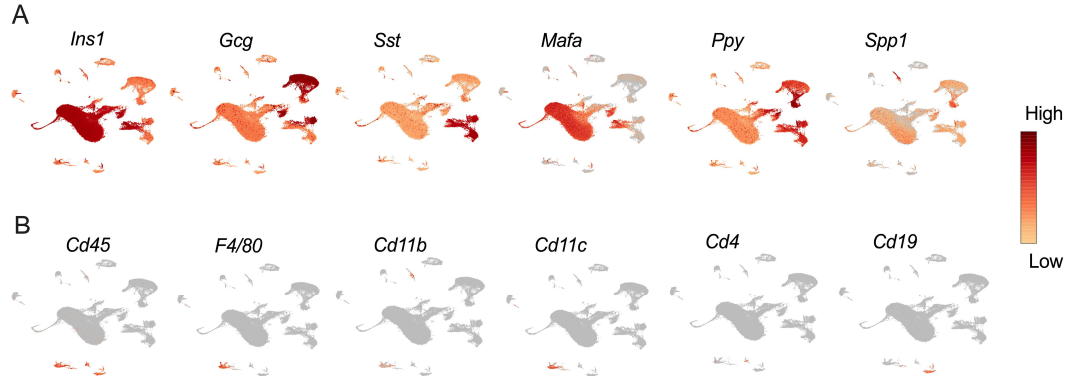

**Supplemental Figure S1.** Genes used for identification of cell clusters. Single cells were obtained from dissociated islets from male *C57BL/6J* mice fed for one week with either a high fat diet (HFD, 60% kcal from fat) or a control low fat diet (LFD, 10% kcal from fat) and used to perform single-cell RNA sequencing analysis. (A) UMAP plots showing spatial expression of identifying genes for the 6 major types of endocrine cells: *Ins1*, *Gcg*, *Sst*, *Mafa*, *Ppy*, *Spp1*; (B) Expression markers for 5 major populations of immune cells: *Cd45*, *F4/80*, *Cd11b*, *Cd11c*, *Cd4* and *Cd19*. Color assignments represent levels of expression.

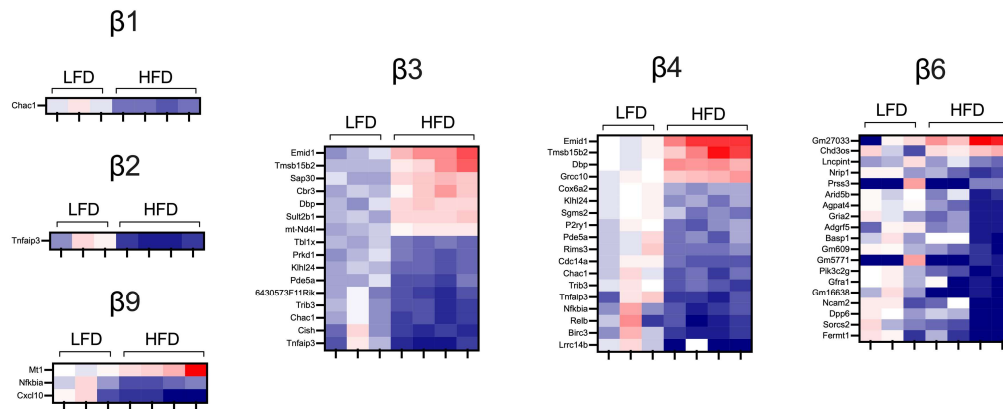

**Supplemental Figure S2.** Identification of differentially expressed genes of the major  $\beta$  cell clusters.  $\beta$ -cell clusters were identified from dissociated islets from male *C57BL/6J* mice fed for one week with either a high fat diet (HFD, 60% kcal from fat) or a control low fat diet (LFD, 10% kcal from fat). Shown are heatmaps of the major  $\beta$ -cell clusters of genes significantly differentially expressed ( $p < 0.05$ ) in the  $\beta$ -cell clusters; genes are ordered from most positive to most negative fold-change.
